# Supplementary material for: Predators and nutrient availability favor protozoa-resisting bacteria in aquatic systems
Source: PubMed Central journal article supplement (PMC5976761; doi:10.1038/s41598-018-26422-4), 2018-05-30
Supplement: 41598_2018_26422_MOESM1_ESM.pdf [file 41598_2018_26422_MOESM1_ESM.pdf]

1 **Supplementary Information:**

2

3 **Title: Predators and nutrient availability favor protozoa-resisting bacteria in aquatic**  
4 **systems**

5 **By: Andersson A, Ahlinder J, Mathisen P, Hägglund M, Bäckman S, Nilsson E, Sjödin A,**  
6 **Thelaus J**

7

8 **Sampling of water:** In August 2013, 60 liters of water were sampled from a small eutrophic  
 9 lake in southern Sweden (Lat. 15.146716, Long. 59.268392). The water was collected at 0.5  
 10 m depth using a Ruttner sampler. The *in situ* temperature was ~20 °C, the dissolved organic  
 11 carbon (DOC) concentration was 29 mg l<sup>-1</sup>, total nitrogen (TN) was 1479 µg l<sup>-1</sup>, total  
 12 dissolved organic nitrogen (TDN) was 1177 µg l<sup>-1</sup>, total phosphorus (TP) was 88 µg l<sup>-1</sup> and  
 13 total dissolved phosphorus (TDP) was 35 µg l<sup>-1</sup>. The water was transported to the laboratory  
 14 and the microcosm experiment began within 48 hours.

15 **Supplementary Figure 1:** Experimental design.

16

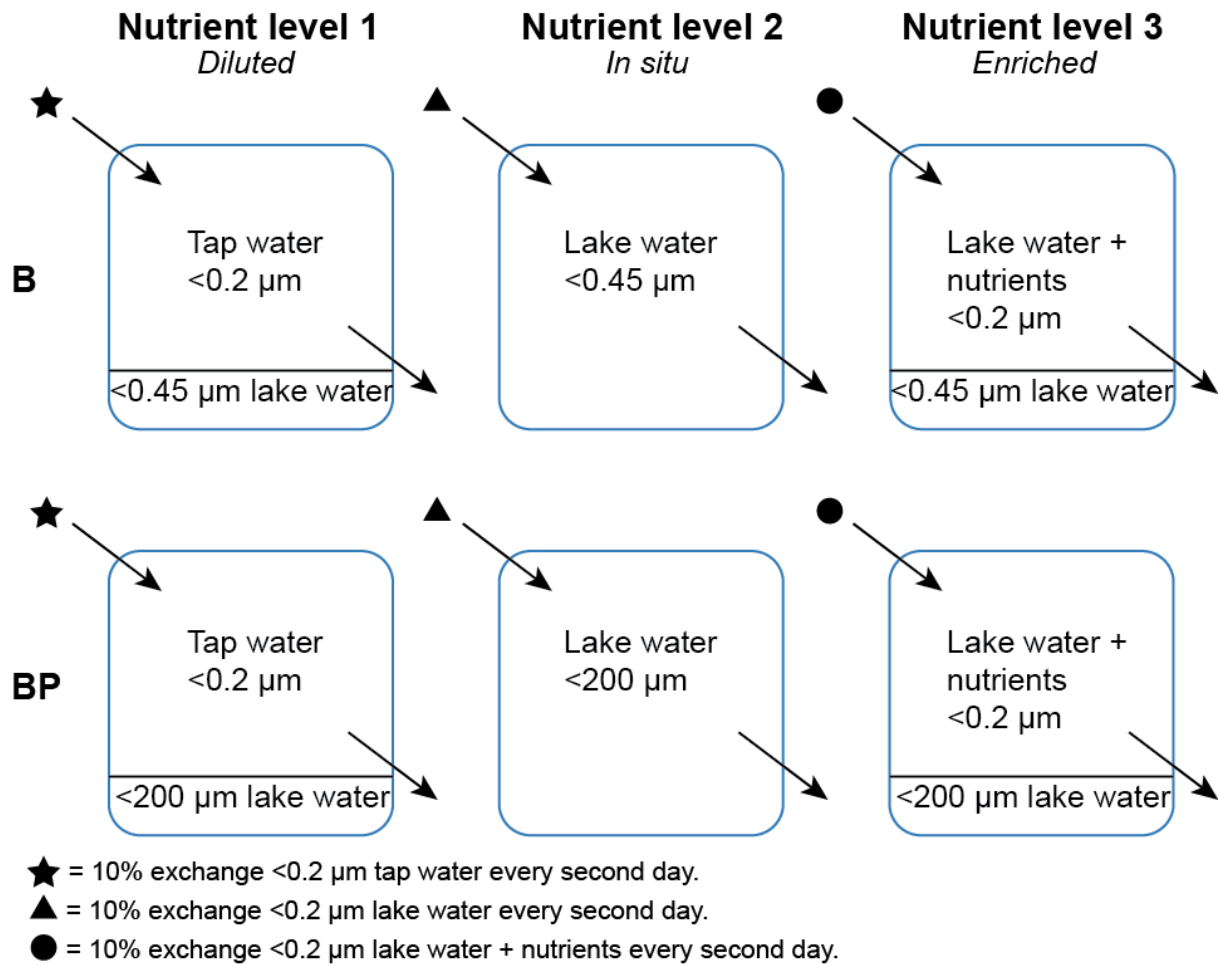

17

18

19 **Treatments:** B1 (bacterial nutrient level 1, diluted) - lake bacteria (obtained by 0.45 µm-  
 20 filtering lake water) were incubated in low nutrient water (0.2 µm-filtered tap water). BP1  
 21 (bacteria + predators, nutrient level 1) - lake bacteria, protozoa, phytoplankton and rotifers  
 22 (200 µm-filtered lake water) were incubated in low nutrient water (0.2 µm-filtered tap water).  
 23 B2 (bacterial nutrient level 2, *in situ*) - lake bacteria (0.45 µm-filtered lake water). BP2  
 24 (bacteria + predators, nutrient level 2, *in situ*) - lake bacteria, protozoa, phytoplankton and  
 25 rotifers (200 µm-filtered lake water). B3 (bacterial nutrient level 3, enriched) - lake bacteria  
 26 (0.45 µm-filtered lake water) incubated in nutrient-enriched 0.2 µm-filtered lake water. BP3  
 27 (bacteria + predators, nutrient level 3) - lake bacteria, protozoa, phytoplankton and rotifers  
 28 (200 µm-filtered lake water) incubated in 0.2 µm-filtered nutrient-enriched lake water.

29 **Accomplishment:** For the B1, BP1, B3, and BP3 treatments, 10% (by volume) of the  
30 appropriate inoculate (0.45  $\mu\text{m}$ -filtered or 200  $\mu\text{m}$ -filtered lake water) was mixed with 90 %  
31 (by volume) of the appropriate medium (0.2  $\mu\text{m}$ -filtered tap water or 0.2  $\mu\text{m}$ -filtered lake  
32 water). For the B2 and BP2 treatments, the “inoculates” constituted 100% of the water  
33 volume. Samples for the B3 and BP3 treatments were then enriched by adding organic carbon  
34 and inorganic nitrogen and phosphorus. The organic carbon solution consisted of glucose,  
35 galactose and sodium acetate (total addition 50 mg C l<sup>-1</sup>), the inorganic nitrogen solution  
36 contained NaNO<sub>3</sub>, (total addition 2.5 mg N l<sup>-1</sup>), and the inorganic phosphorus solution  
37 contained NaH<sub>2</sub>PO<sub>4</sub> (total addition 19  $\mu\text{g}$  P l<sup>-1</sup>). The CN additions were performed to mimic  
38 hypertrophic conditions (Zielinski et al. 2015). At the start of the experiment (day 0), 75% of  
39 the CN nutrients were added. After this initial boost addition, 8.3% of the nutrients were  
40 added on days 2, 4 and 6. P additions started on day 4 and were performed in a similar way as  
41 for C and N, but the additions were relatively small, resulting in values comparable to those in  
42 less productive freshwater systems (e.g. Andersson et al. 2013). The total volume of each  
43 microcosm was 1.3 liter and every second day 10% of the water was exchanged with new  
44 medium to stabilize the productivity in the different treatments. The flasks were incubated in  
45 darkness at room temperature (20 °C). Samples for analysis of bacterial composition,  
46 plankton biomass, and chemical factors were collected on days 0, 2, 4, 6 and 8.

47

48

49

50 **References:**

51 Andersson A, Jurgensone I, Rowe OF, Simonelli P, Bignert A, Lundberg E, Karlsson J.  
52 (2013). Can humic water discharge counteract eutrophication in coastal waters? *Plos*  
53 *One* 8 (4) doi:10.1371/journal.pone.00061293

54 Zielinski P, Grabowska M, Jekatierynczuk-Rudczyk E. (2016). Influence of changeable  
55 hydro-meteorological conditions on dissolved organic carbon and bacterioplankton  
56 abundance n a hypertrophic reservoir and downstream river. *Ecohydrology* 9: 382-395.

57

58 **Supplementary Figure 2.** Rarefaction curves of the DNA sequences.

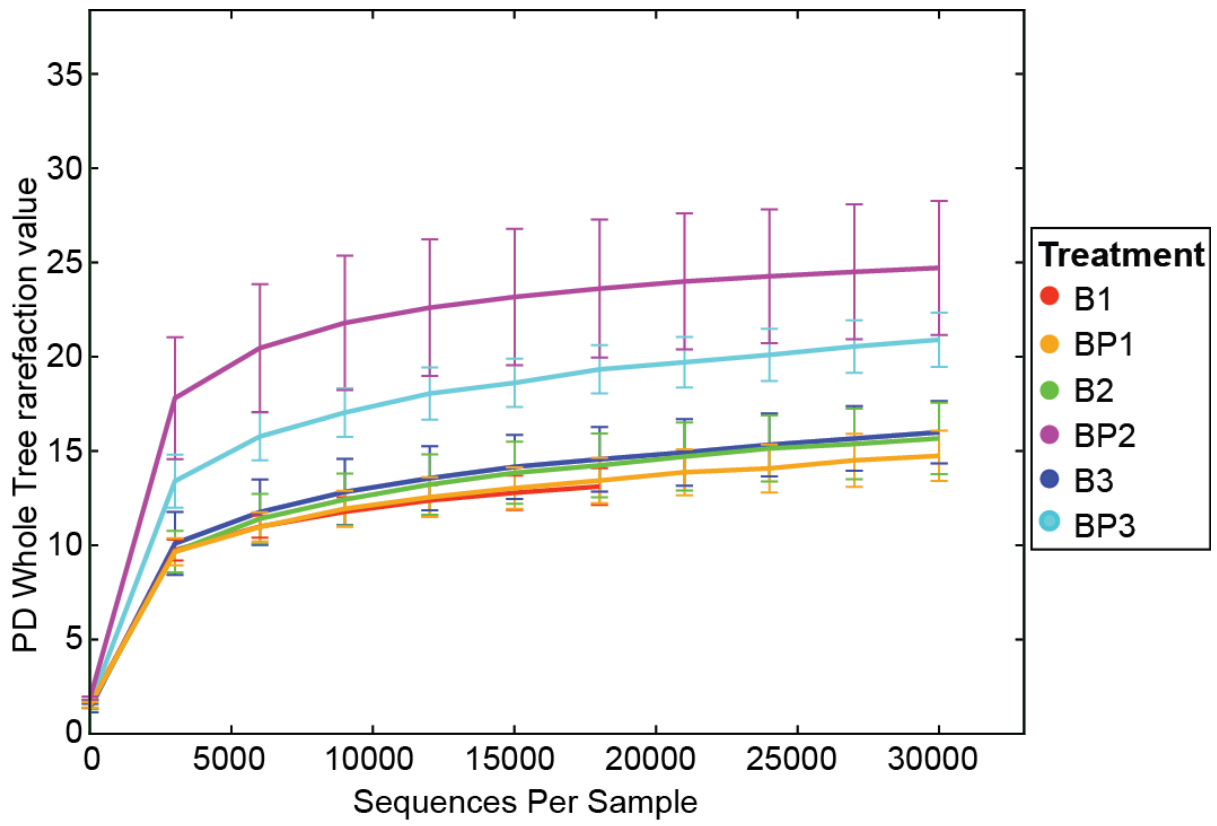

59

60

61 **Supplementary Figure 3.** Bacterial community composition at phylum level including sub-  
62 classes of Proteobacteria for each sample in the experiment. Treatments: B = bacteria, BP =  
63 bacteria+predators and nutrient level = 1 (diluted), 2 (*in situ*), or 3 (enriched).

64

65

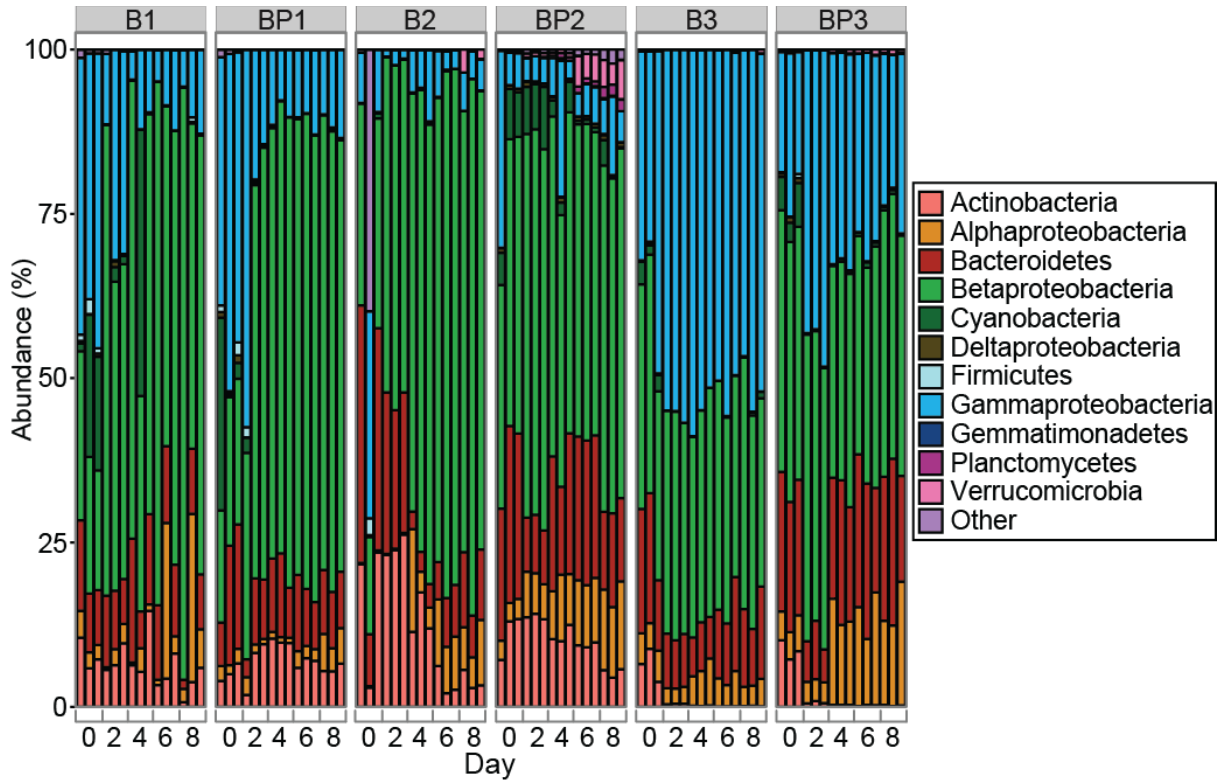

66

67

68

69 **Supplementary Figure 4. A:** Principal component analysis of the occurrence (proportions) of  
 70 the PRB genera *Pseudomonas*, *Mycobacterium* and *Rickettsia* in relation to different  
 71 environmental variables at the last day of the experiment\*. **B:** Heatmap of the Pearson  
 72 correlations between different PRB's at the last day of the experiment. Abbreviations:  
 73 Bacteria (heterotrophic bacteria), TN (total nitrogen), DOC (dissolved organic carbon),  
 74 Autotrophs (prokaryotic and eukaryotic photosynthetic organisms), Mixotrophs (mixotrophic  
 75 flagellates), Heterotrophs (heterotrophic predators), PredPress (ratio Heterotrophic  
 76 predators:Bacteria) and TP (total phosphorus).

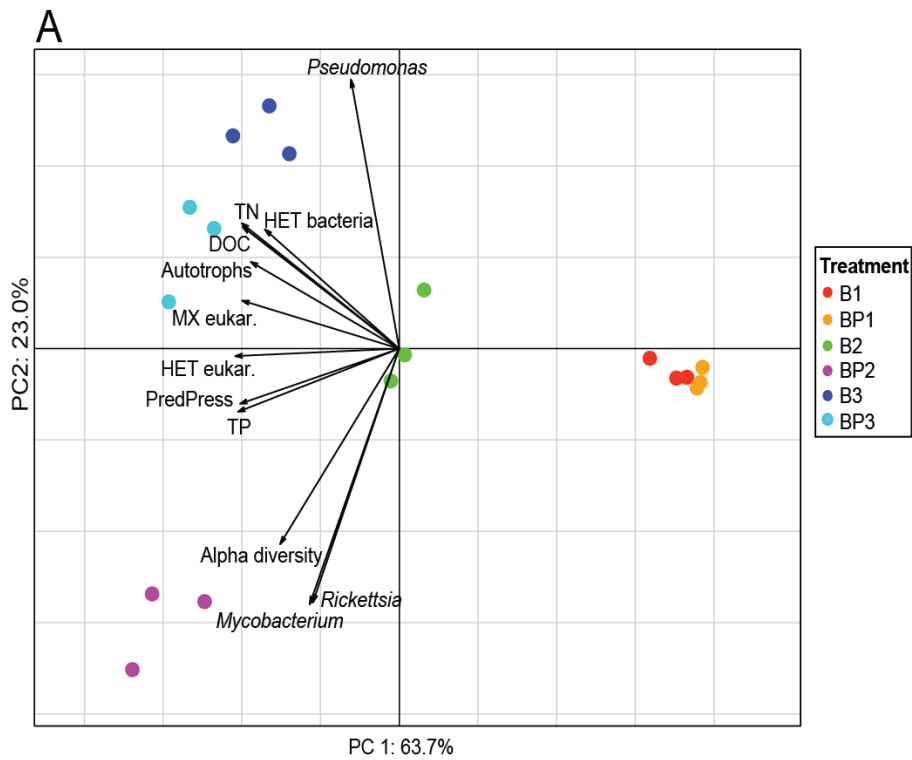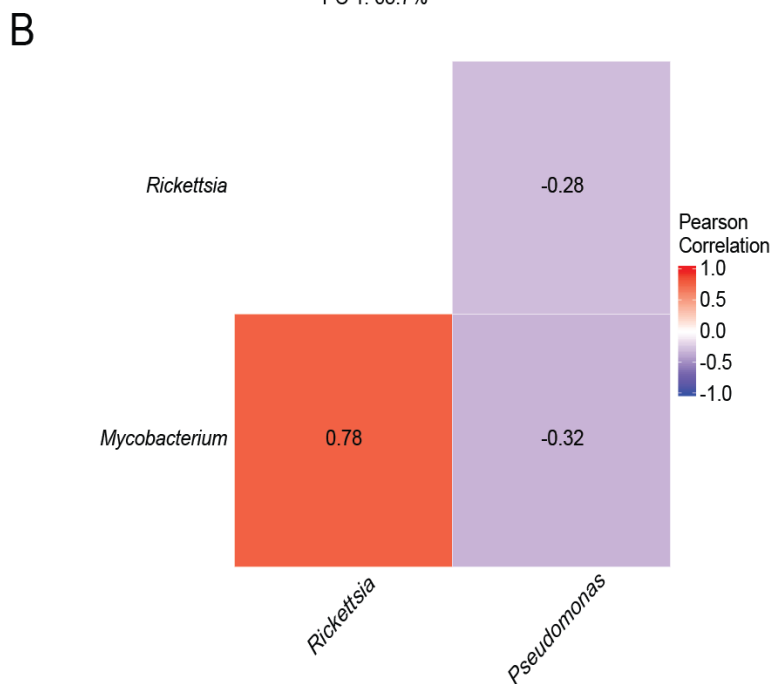

77

78

79 **Supplementary Figure 5:** Summary statistics of the joint species distribution model (JSDM)  
 80 analysis for experiment days 2-8, including effect sizes and 95% effect size confidence  
 81 intervals for the nutrient and predation pressure (PredPress, including only biomass of  
 82 protozoa in the enumerator) parameters. Blue and red colors indicate negative and positive  
 83 effect directions, respectively. Statistical significance at the  $\alpha = 0.05$ ,  $\alpha = 0.01$  and  $\alpha = 0.001$   
 84 levels is denoted by \*, \*\* and \*\*\*, respectively. Treatments: Diluted (nutrient level 1),  
 85 Enriched (nutrient level 3).

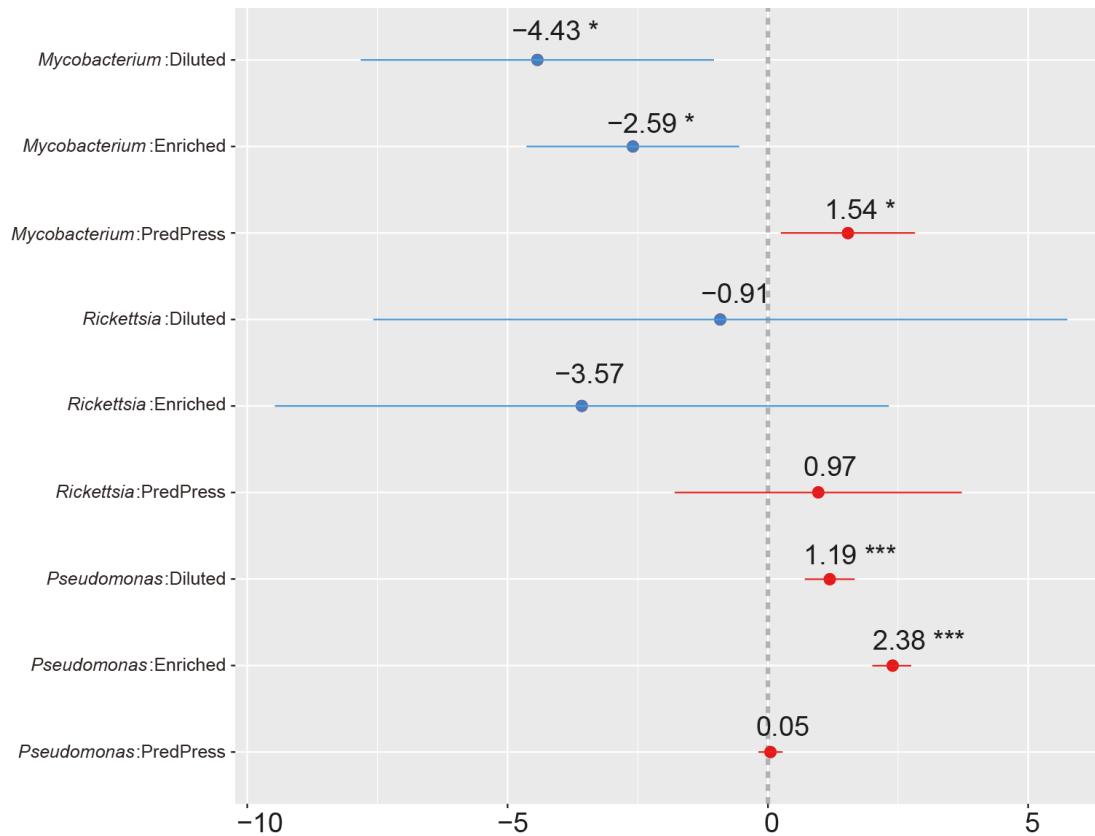

86

87

88

89

90 **Appendix A.** Sequence data can be accessed at the Short Read Archive  
 91 (<http://www.ncbi.nlm.gov/sra>), BioProject ID: PRJNA472564.

92

93 **Appendix B.** Data set and source codes can be accessed at [https://github.com/FOI-](https://github.com/FOI-Bioinformatics/Aquatic-ecosystems-at-risk-of-occurrence-of-pathogenic-bacteria)  
 94 [Bioinformatics/Aquatic-ecosystems-at-risk-of-occurrence-of-pathogenic-bacteria](https://github.com/FOI-Bioinformatics/Aquatic-ecosystems-at-risk-of-occurrence-of-pathogenic-bacteria)

95
